# Supplementary material for: Mechanism of oxidative stress p38MAPK-SGK1 signaling axis in experimental autoimmune encephalomyelitis (EAE)
Source: Oncotarget. 2017 Apr 12;8(26):42808–16. doi: 10.18632/oncotarget.17057 (PMC5522107; doi:10.18632/oncotarget.17057)
Supplement: Supplementary file 1 [file oncotarget-08-42808-s001.pdf]

## Mechanism of oxidative stress p38MAPK-SGK1 signaling axis in experimental autoimmune encephalomyelitis (EAE)

### SUPPLEMENTARY FIGURES AND TABLES

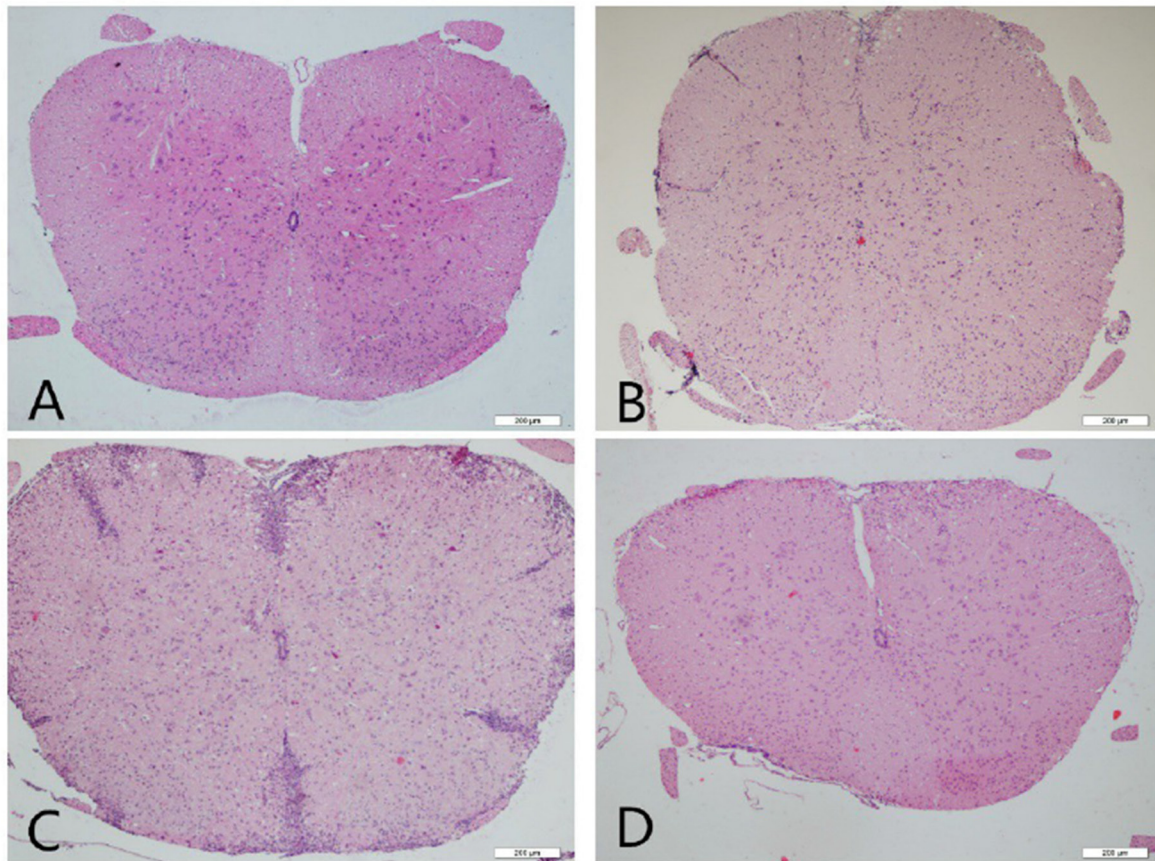

**Supplementary Figure 1: Comparison of HE staining at different time points.** The inflammatory infiltrates were aggravated along with the change of EAE clinical signs. Data shown are representative images from each group or expressed as the mean  $\pm$  SD of each group (n = 6). (A) control, (B) EAE 13d, (C) EAE 20d, (D) EAE 30d. Scale bar = 200  $\mu$ m.

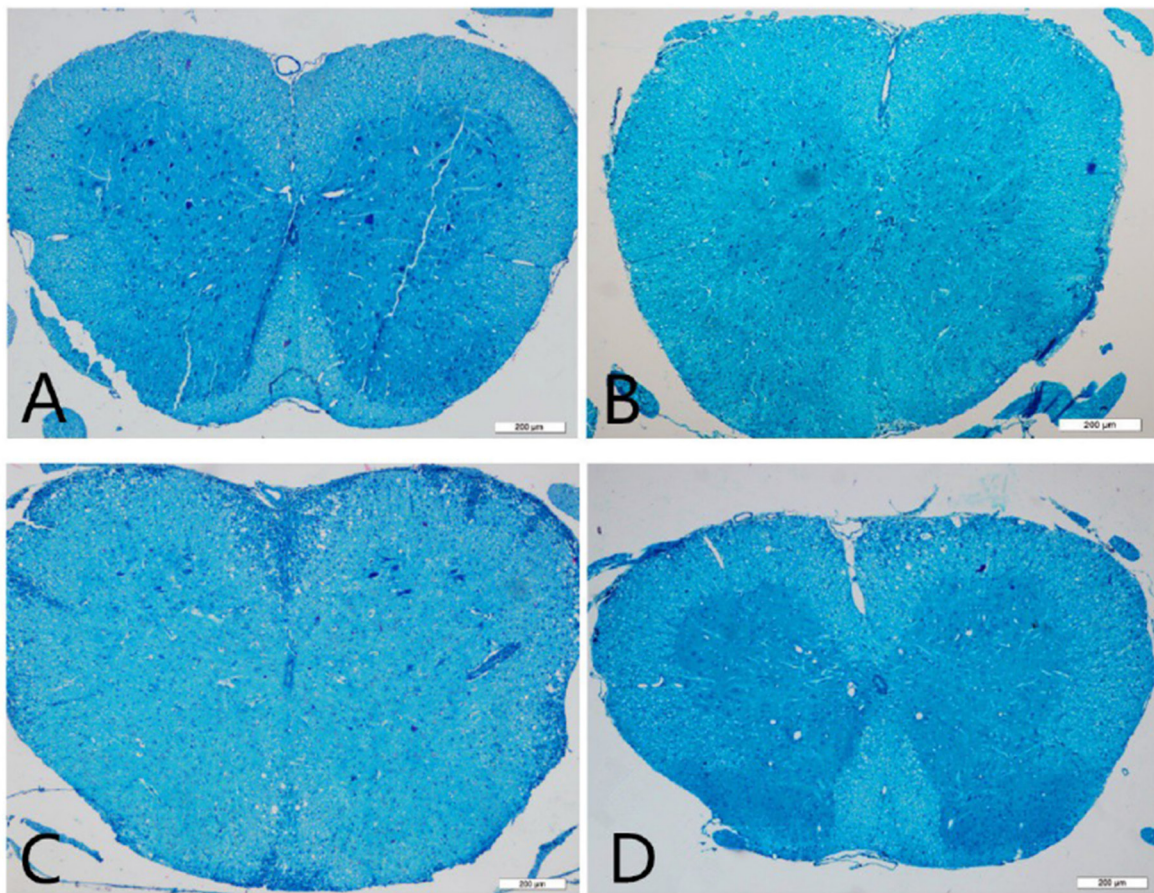

**Supplementary Figure 2: Comparison of LFB staining different time points.** The mean degree of demyelination got worse with the course of disease from onset to remission period. Data shown are representative images from each group or expressed as the mean  $\pm$  SEM of each group ( $n = 6$ ). (A) control, (B) EAE 13d, (C) EAE 18d, (D) EAE 30d. Scale bar = 200  $\mu\text{m}$ .

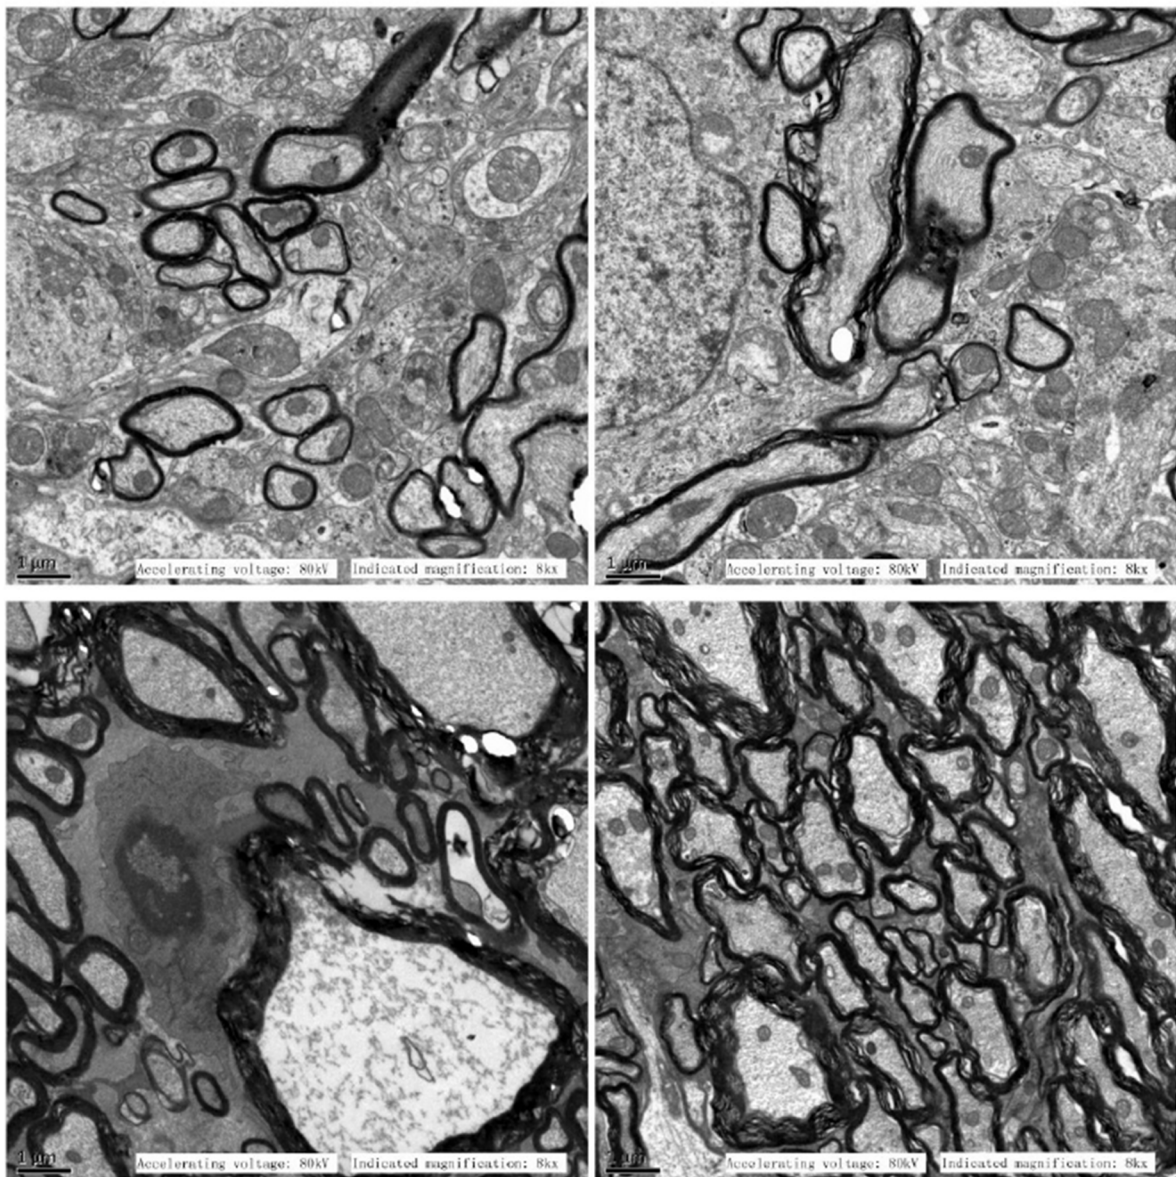

**Supplementary Figure 3: Images of electron microscope for different groups. A:controlB:EAE 13dC:EAE 20dD:EAE 30d.**

**Supplementary Table 1: The mobility in the different experimental groups**

| <b>Group</b> | <b>mobility</b> | <b>onset time</b> | <b>peak time</b> |
|--------------|-----------------|-------------------|------------------|
| EAE          | 100%            | 12.58±1.62        | 18.18±1.40       |
| SB203580     | 41.7%*          | 11.73±1.22*       | 15.82±0.44*      |
| TEMPOL       | 75.0%*          | 10.81±0.50*       | 14.32±1.19*      |

\*P<0.05 vs. the EAE group. n=12 per experimental group.

Supplementary Table 2: The neurofunctional deficiency in different groups

| Group    | premorbid (13d) | fastigium (20d) | paracmastic (30) |
|----------|-----------------|-----------------|------------------|
| EAE      | 2.08±1.98       | 7.17±1.64       | 4.33±1.9         |
| SB203580 | 0.08±0.29*      | 1.67±2.83*      | 0.83±1.59*       |
| TEMPOL   | 0*              | 3.25±2.38*      | 1.17±0.94*       |

\*P<0.05 vs. the EAE group. n=12 per experimental group.

**Supplementary Table 3: Comparison of mean score of inflammation at different time points in the various experimental groups**

| Group    | Premorbid (13d) | Fastigium (20d) | Paracmastic (30d) |
|----------|-----------------|-----------------|-------------------|
| EAE      | 1.00±0.69       | 2.39±0.50       | 0.67±0.49         |
| SB203580 | 0.11±0.32*      | 0.44±0.62*#     | 0.17±0.38*        |
| TEMPOL   | 0.33±0.49*      | 1.06±0.80*      | 0.28±0.46*        |

\*P<0.05 compared with EAE group; #P<0.05 compared with TEMPOL group. n = 6 per experimental group.

**Supplementary Table 4: Comparison of mean score of demyelination at different time points in the various experimental groups**

| Group  | Premorbid (13d) | Fastigium (20d) | Paracmastic (30) |
|--------|-----------------|-----------------|------------------|
| EAE    | 0.83±0.62       | 2.22±0.43       | 2.78±0.43        |
| SB     | 0.06±0.2 ▲      | 0.56±0.62 ▲     | 0.83±0.92 ▲      |
| TEMPOL | 0.22±0.43 ▲     | 1.06±0.80 ▲     | 0.89±1.08 ▲      |

▲ compared with EAE group, P<0.05 (n=6 per experimental group).

**Supplementary Table 5: Comparison of mean counts of IL-17 immunopositive cells in spinal cords at different time points in the EAE group**

| Group             | Mean score of IHC |
|-------------------|-------------------|
| Premorbid (13d)   | 11.33±1.97        |
| Fastigium (20d)   | 26.17±2.64*       |
| Paracmastic (30d) | 12.17±0.98        |

\*compared with other groups,  $P < 0.05$ ; n = 6 per group.

**Supplementary Table 6: Comparison of mean counts of IL-17 immunopositive cells in spinal cords in different experimental groups on day 20**

| Group    | Mean score of IHC |
|----------|-------------------|
| EAE      | 26.17±2.64        |
| SB203580 | 6.83±1.17*        |
| TEMPOL   | 7.67±1.21*        |

\*compared with other groups, P<0.05; n = 6 per group.

**Supplementary Table 7: Concentration of MDA in the spines at different time points**

| Group             | MDA             |
|-------------------|-----------------|
| Control           | 18.40 ± 0.96    |
| Premorbid (13d)   | 34.97 ± 1.84 *  |
| Fastigium (20d)   | 40.30 ± 1.61 *# |
| Paracmastic (30d) | 33.59 ± 2.00*   |

\*compared with control group,  $P < 0.05$  (n = 3 per group); #compared with EAE 13d and 30d,  $P < 0.05$ .
